# Supplementary material
Source: Springer Nature journal article supplement (https://www.springermedizin.de/resource/supplementary/13046_2010_404_MOESM3_ESM.pdf/9661948)
Supplement: MOESM3 [file 9661948]

# Log 8-oxodG

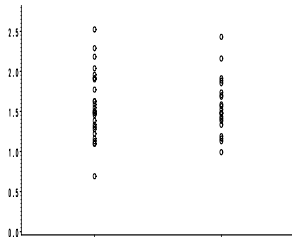

*GSTM1*\*2/2  
n= 28

Wild type  
n= 22

*GSTM1*

# Log 8-oxodG

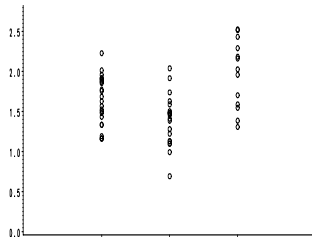

*Ile/Ile*  
n= 24

*Ile/Val*  
n= 21

*Val/Val*  
n= 13

*GSTP1*

# Log 8-oxodG

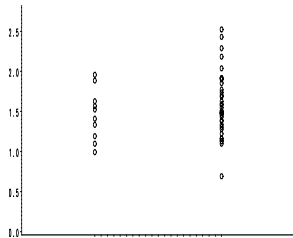

*GSTT1*\*2/2  
n= 10

Wild type  
n= 39

*GSTT1*
